# Supplementary material
Source: PubMed Central journal article supplement (PMC8715416)
Supplement: table_s1_taab149.pdf [file table_s1_taab149.pdf]

We gratefully acknowledge the following Authors from the Originating laboratories responsible for obtaining the specimens, as well as the Submitting laboratories where the genome data were generated and shared via GISAID, on which this research is based.

All Submitters of data may be contacted directly via [www.gisaid.org](http://www.gisaid.org)

Authors are sorted alphabetically.

| Accession ID                                                                                                                                                                                               | Originating Laboratory                                                     | Submitting Laboratory                                                      | Authors                                                                                                                                                                                                                             |
|------------------------------------------------------------------------------------------------------------------------------------------------------------------------------------------------------------|----------------------------------------------------------------------------|----------------------------------------------------------------------------|-------------------------------------------------------------------------------------------------------------------------------------------------------------------------------------------------------------------------------------|
| EPI_ISL_1034266, EPI_ISL_1034270, EPI_ISL_1081924, EPI_ISL_1081930, EPI_ISL_1081945, EPI_ISL_1081946, EPI_ISL_1098834, EPI_ISL_1164353                                                                     | National Public Health Laboratory, National Centre for Infectious Diseases | National Public Health Laboratory, National Centre for Infectious Diseases | Tze Minn Mak, Zhenyang Zhou, Lin Cui, Raymond Tzer Pin Lin                                                                                                                                                                          |
| EPI_ISL_1173251                                                                                                                                                                                            | National Public Health Laboratory, National Centre for Infectious Diseases | National Public Health Laboratory, National Centre for Infectious Diseases | Tze Minn Mak, Zhenyang Zhou, Royce Ang, Lin Cui, Raymond Tzer Pin Lin                                                                                                                                                               |
| EPI_ISL_1229167, EPI_ISL_1252452, EPI_ISL_1252453, EPI_ISL_1295939, EPI_ISL_1312382, EPI_ISL_1312383                                                                                                       | National Public Health Laboratory, National Centre for Infectious Diseases | National Public Health Laboratory, National Centre for Infectious Diseases | Tze Minn Mak, Zhenyang Zhou, Grace Jie Yin Ngan, Royce Ang, Lin Cui, Raymond Tzer Pin Lin                                                                                                                                           |
| EPI_ISL_1357691, EPI_ISL_1357692, EPI_ISL_1357693, EPI_ISL_1357695, EPI_ISL_1357697, EPI_ISL_1357698, EPI_ISL_1357699, EPI_ISL_1357700, EPI_ISL_1357702, EPI_ISL_1357703, EPI_ISL_1357705, EPI_ISL_1357706 | see above                                                                  | INSACOG-WB<br>National Institute of Biomedical Genomics                    | Arindam Maitra, Bhaswati Bandyopadhyay, Nidhan Kumar Biswas, Tamal Ghosh, Sreedhar Chinnaswamy, Ajay Chakraborti, Saumitra Das                                                                                                      |
| EPI_ISL_1360354, EPI_ISL_1360355                                                                                                                                                                           | CSIR-National Environmental Engineering Research Institute                 | CSIR-Centre for Cellular and Molecular Biology - INSACOG                   | Ara Sreenivas, Onkar Kulkarni, Lamuk Zaveri, Sofia Banu, Shreekant Verma, Amareshwar Vodapalli , Viswagithe S L, B Himasri, Sharath Chandra Thota, Karthik Bharadwaj Tallapaka, Krishna Khairnar, Rakesh K Mishra,Divya Tej Sowpati |
| EPI_ISL_1360356                                                                                                                                                                                            | CSIR-National Environmental Engineering Research Institute                 | CSIR-Centre for Cellular and Molecular Biology - INSACOG                   | Sofia Banu, Lamuk Zaveri, Ara Sreenivas, Shreekant Verma, Onkar Kulkarni, Amareshwar Vodapalli , Viswagithe S L, B Himasri, Sharath Chandra Thota, Karthik Bharadwaj Tallapaka, Krishna Khairnar, Rakesh K Mishra,Divya Tej Sowpati |
| EPI_ISL_1360359                                                                                                                                                                                            | CSIR-National Environmental Engineering Research Institute                 | CSIR-Centre for Cellular and Molecular Biology - INSACOG                   | Lamuk Zaveri, Ara Sreenivas, Sofia Banu, Onkar Kulkarni, Shreekant Verma, Amareshwar Vodapalli , Viswagithe S L, B Himasri, Sharath Chandra Thota, Karthik Bharadwaj Tallapaka, Krishna Khairnar, Rakesh K Mishra,Divya Tej Sowpati |
| EPI_ISL_1360360                                                                                                                                                                                            | CSIR-National Environmental Engineering Research Institute                 | CSIR-Centre for Cellular and Molecular Biology - INSACOG                   | Lamuk Zaveri, Ara Sreenivas, Onkar Kulkarni, Sofia Banu, Shreekant Verma, Amareshwar Vodapalli, Viswagithe S L, B Himasri, Sharath Chandra Thota, Karthik Bharadwaj Tallapaka, Krishna Khairnar, Rakesh K Mishra,Divya Tej Sowpati  |
| EPI_ISL_1360361, EPI_ISL_1360362                                                                                                                                                                           | CSIR-National Environmental Engineering Research Institute                 | CSIR-Centre for Cellular and Molecular Biology - INSACOG                   | Ara Sreenivas, Onkar Kulkarni, Lamuk Zaveri, Sofia Banu, Shreekant Verma, Amareshwar Vodapalli , Viswagithe S L, B Himasri, Sharath Chandra Thota, Karthik Bharadwaj Tallapaka, Krishna Khairnar, Rakesh K Mishra,Divya Tej Sowpati |
| EPI_ISL_1360364                                                                                                                                                                                            | CSIR-National Environmental Engineering Research Institute                 | CSIR-Centre for Cellular and Molecular Biology - INSACOG                   | Sofia Banu, Lamuk Zaveri, Ara Sreenivas, Shreekant Verma, Onkar Kulkarni, Amareshwar Vodapalli , Viswagithe S L, B Himasri, Sharath Chandra Thota, Karthik Bharadwaj Tallapaka, Krishna Khairnar, Rakesh K Mishra,Divya Tej Sowpati |
| EPI_ISL_1360365, EPI_ISL_1360366                                                                                                                                                                           | CSIR-National Environmental Engineering Research Institute                 | CSIR-Centre for Cellular and Molecular Biology - INSACOG                   | Onkar Kulkarni, Lamuk Zaveri, Ara Sreenivas, Sofia Banu, Shreekant Verma, Amareshwar Vodapalli , Viswagithe S L, B Himasri, Sharath Chandra Thota, Karthik Bharadwaj Tallapaka, Krishna Khairnar, Rakesh K Mishra,Divya Tej Sowpati |
| EPI_ISL_1360367                                                                                                                                                                                            | CSIR-National Environmental Engineering Research Institute                 | CSIR-Centre for Cellular and Molecular Biology - INSACOG                   | Lamuk Zaveri, Ara Sreenivas, Sofia Banu, Onkar Kulkarni, Shreekant Verma, Amareshwar Vodapalli , Viswagithe S L, B Himasri, Sharath Chandra Thota, Karthik Bharadwaj Tallapaka, Krishna Khairnar, Rakesh K Mishra,Divya Tej Sowpati |
| EPI_ISL_1360368                                                                                                                                                                                            | CSIR-National Environmental Engineering Research Institute                 | CSIR-Centre for Cellular and Molecular Biology - INSACOG                   | Lamuk Zaveri, Ara Sreenivas, Onkar Kulkarni, Sofia Banu, Shreekant Verma, Amareshwar Vodapalli, Viswagithe S L, B Himasri, Sharath Chandra Thota, Karthik Bharadwaj Tallapaka, Krishna Khairnar, Rakesh K Mishra,Divya Tej Sowpati  |
| EPI_ISL_1360369, EPI_ISL_1360370                                                                                                                                                                           | CSIR-National Environmental Engineering Research Institute                 | CSIR-Centre for Cellular and Molecular Biology - INSACOG                   | Ara Sreenivas, Onkar Kulkarni, Lamuk Zaveri, Sofia Banu, Shreekant Verma, Amareshwar Vodapalli , Viswagithe S L, B Himasri, Sharath Chandra Thota, Karthik Bharadwaj Tallapaka, Krishna Khairnar, Rakesh K Mishra,Divya Tej Sowpati |
| EPI_ISL_1360371, EPI_ISL_1360372                                                                                                                                                                           | CSIR-National Environmental Engineering Research Institute                 | CSIR-Centre for Cellular and Molecular Biology - INSACOG                   | Sofia Banu, Lamuk Zaveri, Ara Sreenivas, Shreekant Verma, Onkar Kulkarni, Amareshwar Vodapalli , Viswagithe S L, B Himasri, Sharath Chandra Thota, Karthik Bharadwaj Tallapaka, Krishna Khairnar, Rakesh K Mishra,Divya Tej Sowpati |
| EPI_ISL_1360373                                                                                                                                                                                            | CSIR-National Environmental Engineering Research Institute                 | CSIR-Centre for Cellular and Molecular Biology - INSACOG                   | Onkar Kulkarni, Lamuk Zaveri, Ara Sreenivas, Sofia Banu, Shreekant Verma, Amareshwar Vodapalli , Viswagithe S L, B Himasri, Sharath Chandra Thota, Karthik Bharadwaj Tallapaka, Krishna Khairnar, Rakesh K Mishra,Divya Tej Sowpati |
| EPI_ISL_1360375                                                                                                                                                                                            | CSIR-National Environmental Engineering Research Institute                 | CSIR-Centre for Cellular and Molecular Biology - INSACOG                   | Lamuk Zaveri, Ara Sreenivas, Sofia Banu, Onkar Kulkarni, Shreekant Verma, Amareshwar Vodapalli , Viswagithe S L, B Himasri, Sharath Chandra Thota, Karthik Bharadwaj Tallapaka, Krishna Khairnar, Rakesh K Mishra,Divya Tej Sowpati |
| EPI_ISL_1360377, EPI_ISL_1360378                                                                                                                                                                           | CSIR-National Environmental Engineering Research Institute                 | CSIR-Centre for Cellular and Molecular Biology - INSACOG                   | Ara Sreenivas, Onkar Kulkarni, Lamuk Zaveri, Sofia Banu, Shreekant Verma, Amareshwar Vodapalli , Viswagithe S L, B Himasri, Sharath Chandra Thota, Karthik Bharadwaj Tallapaka, Krishna Khairnar, Rakesh K Mishra,Divya Tej Sowpati |
| EPI_ISL_1360381, EPI_ISL_1360382                                                                                                                                                                           | CSIR-National Environmental Engineering Research Institute                 | CSIR-Centre for Cellular and Molecular Biology - INSACOG                   | Onkar Kulkarni, Lamuk Zaveri, Ara Sreenivas, Sofia Banu, Shreekant Verma, Amareshwar Vodapalli , Viswagithe S L, B Himasri, Sharath Chandra Thota, Karthik Bharadwaj Tallapaka, Krishna Khairnar, Rakesh K Mishra,Divya Tej Sowpati |
| EPI_ISL_1360383                                                                                                                                                                                            | CSIR-National Environmental Engineering Research Institute                 | CSIR-Centre for Cellular and Molecular Biology - INSACOG                   | Lamuk Zaveri, Ara Sreenivas, Sofia Banu, Onkar Kulkarni, Shreekant Verma, Amareshwar Vodapalli , Viswagithe S L, B Himasri, Sharath Chandra Thota, Karthik Bharadwaj Tallapaka, Krishna Khairnar, Rakesh K Mishra,Divya Tej Sowpati |
| EPI_ISL_1360384                                                                                                                                                                                            | CSIR-National Environmental Engineering Research Institute                 | CSIR-Centre for Cellular and Molecular Biology - INSACOG                   | Lamuk Zaveri, Ara Sreenivas, Onkar Kulkarni, Sofia Banu, Shreekant Verma, Amareshwar Vodapalli, Viswagithe S L, B Himasri, Sharath Chandra Thota, Karthik Bharadwaj Tallapaka, Krishna Khairnar, Rakesh K Mishra,Divya Tej Sowpati  |
| EPI_ISL_1360385                                                                                                                                                                                            | CSIR-National Environmental Engineering Research Institute                 | CSIR-Centre for Cellular and Molecular Biology - INSACOG                   | Ara Sreenivas, Onkar Kulkarni, Lamuk Zaveri, Sofia Banu, Shreekant Verma, Amareshwar Vodapalli , Viswagithe S L, B Himasri, Sharath Chandra Thota, Karthik Bharadwaj Tallapaka, Krishna Khairnar, Rakesh K Mishra,Divya Tej Sowpati |
| EPI_ISL_1360387, EPI_ISL_1360388                                                                                                                                                                           | CSIR-National Environmental Engineering Research Institute                 | CSIR-Centre for Cellular and Molecular Biology - INSACOG                   | Sofia Banu, Lamuk Zaveri, Ara Sreenivas, Shreekant Verma, Onkar Kulkarni, Amareshwar Vodapalli , Viswagithe S L, B Himasri, Sharath Chandra Thota, Karthik Bharadwaj Tallapaka, Krishna Khairnar, Rakesh K Mishra,Divya Tej Sowpati |
| EPI_ISL_1367555, EPI_ISL_1367560                                                                                                                                                                           | National Public Health Laboratory, National Centre for Infectious Diseases | National Public Health Laboratory, National Centre for Infectious Diseases | Tze Minn Mak, Zhenyang Zhou, Grace Jie Yin Ngan, Royce Ang, Lin Cui, Raymond Tzer Pin Lin                                                                                                                                           |
| EPI_ISL_1372009                                                                                                                                                                                            | Patna Medical College, Patna                                               | Institute of Life Sciences - INSACOG                                       | Sunil K. Raghav, Safal Wallia, Arup Ghosh, Atimukta Jha, Amol M. Kanampalliwar, Shifu Aggarwal, Rupesh Dash, Rajeeb Swain, Punit Prasad, INSACOG Consortium, Ajay Parida                                                            |
| EPI_ISL_1372010                                                                                                                                                                                            | Immunogenomics lab, Institute of Life Sciences, Bhubaneswar                | Institute of Life Sciences - INSACOG                                       | Sunil K. Raghav, Safal Wallia, Arup Ghosh, Atimukta Jha, Amol M. Kanampalliwar, Shifu Aggarwal, Rupesh Dash, Rajeeb Swain, Punit Prasad, INSACOG Consortium, Ajay Parida                                                            |
| EPI_ISL_1372095                                                                                                                                                                                            | Nalanda Medical College Hospital, Patna                                    | Institute of Life Sciences - INSACOG                                       | Sunil K. Raghav, Safal Wallia, Arup Ghosh, Atimukta Jha, Amol M. Kanampalliwar, Shifu Aggarwal, Rupesh Dash, Rajeeb Swain, Punit Prasad, INSACOG Consortium, Ajay Parida                                                            |
| EPI_ISL_1372278                                                                                                                                                                                            | Mapmygenome                                                                | CSIR-Centre for Cellular and Molecular Biology - INSACOG                   | Ara Sreenivas, Onkar Kulkarni, Lamuk Zaveri, Sofia Banu, Shreekant Verma, Amareshwar Vodapalli , Viswagithe S L, B Himasri, Sharath Chandra Thota, Karthik Bharadwaj Tallapaka, Rakesh K Mishra,Divya Tej Sowpati                   |
| EPI_ISL_1384818                                                                                                                                                                                            | National Centre For Cell Science                                           | National Centre For Cell Science                                           | Dhiraj Paul, Sonal Manik Chavan, Mohak P Gujare, Shivang P. Bhanushali, Mitali Inamdar, Manoj Kumar Bhat, Ajay Pillai, Yogesh Shouche                                                                                               |

|                                                                                                                                                                                                                                                                                                                                                                                                                                                                                                                                                                                                                                                                                                                                                                                                                                                                                                                                                                                                                                                                                                                                                                                                                                                                                                                                                                                                                                                                                                                                                                                                                                                                                                                                                                                                                                                                                                                                                                                                                                                                                                                                                                                                                                                                                                                                                                                                                                                                                                                                                                                                                                                                                                                                                                                                                                                                                                                                                                                                                                                             |                                                    |                                                                            |                                                                                                                                                                                                                                             |                                                                                                                                                                 |
|-------------------------------------------------------------------------------------------------------------------------------------------------------------------------------------------------------------------------------------------------------------------------------------------------------------------------------------------------------------------------------------------------------------------------------------------------------------------------------------------------------------------------------------------------------------------------------------------------------------------------------------------------------------------------------------------------------------------------------------------------------------------------------------------------------------------------------------------------------------------------------------------------------------------------------------------------------------------------------------------------------------------------------------------------------------------------------------------------------------------------------------------------------------------------------------------------------------------------------------------------------------------------------------------------------------------------------------------------------------------------------------------------------------------------------------------------------------------------------------------------------------------------------------------------------------------------------------------------------------------------------------------------------------------------------------------------------------------------------------------------------------------------------------------------------------------------------------------------------------------------------------------------------------------------------------------------------------------------------------------------------------------------------------------------------------------------------------------------------------------------------------------------------------------------------------------------------------------------------------------------------------------------------------------------------------------------------------------------------------------------------------------------------------------------------------------------------------------------------------------------------------------------------------------------------------------------------------------------------------------------------------------------------------------------------------------------------------------------------------------------------------------------------------------------------------------------------------------------------------------------------------------------------------------------------------------------------------------------------------------------------------------------------------------------------------|----------------------------------------------------|----------------------------------------------------------------------------|---------------------------------------------------------------------------------------------------------------------------------------------------------------------------------------------------------------------------------------------|-----------------------------------------------------------------------------------------------------------------------------------------------------------------|
| EPI_ISL_1384819, EPI_ISL_1384822, EPI_ISL_1384823, EPI_ISL_1384824, EPI_ISL_1384830, EPI_ISL_1384831, EPI_ISL_1384832, EPI_ISL_1384833, EPI_ISL_1384834, EPI_ISL_1384835, EPI_ISL_1384843, EPI_ISL_1384844, EPI_ISL_1384845, EPI_ISL_1384846, EPI_ISL_1384847, EPI_ISL_1384850, EPI_ISL_1384851, EPI_ISL_1384852                                                                                                                                                                                                                                                                                                                                                                                                                                                                                                                                                                                                                                                                                                                                                                                                                                                                                                                                                                                                                                                                                                                                                                                                                                                                                                                                                                                                                                                                                                                                                                                                                                                                                                                                                                                                                                                                                                                                                                                                                                                                                                                                                                                                                                                                                                                                                                                                                                                                                                                                                                                                                                                                                                                                            | see above                                          | National Centre For Cell Science                                           | National Centre For Cell Science - INSACOG                                                                                                                                                                                                  | Dhiraj Paul, Mitali Inamdar, Sonal Manik Chavan, Mohak P Gujare, Shivang P. Bhanushali, Manoj Kumar Bhat, Ajay Pillai, Yogesh Shouche.                          |
| EPI_ISL_1384859                                                                                                                                                                                                                                                                                                                                                                                                                                                                                                                                                                                                                                                                                                                                                                                                                                                                                                                                                                                                                                                                                                                                                                                                                                                                                                                                                                                                                                                                                                                                                                                                                                                                                                                                                                                                                                                                                                                                                                                                                                                                                                                                                                                                                                                                                                                                                                                                                                                                                                                                                                                                                                                                                                                                                                                                                                                                                                                                                                                                                                             | see above                                          | National Centre For Cell Science                                           | National Institute of Virology, Pune                                                                                                                                                                                                        | Dhiraj Paul, Mitali Inamdar, Sonal Manik Chavan, Mohak P Gujare, Shivang P. Bhanushali, Manoj Kumar Bhat, Ajay Pillai, Yogesh Shouche                           |
| EPI_ISL_1384860, EPI_ISL_1384862, EPI_ISL_1384864, EPI_ISL_1384865, EPI_ISL_1384866, EPI_ISL_1384867, EPI_ISL_1384868, EPI_ISL_1384871, EPI_ISL_1384872, EPI_ISL_1384873, EPI_ISL_1384874, EPI_ISL_1384875, EPI_ISL_1384876, EPI_ISL_1384877, EPI_ISL_1384878, EPI_ISL_1384879, EPI_ISL_1384880, EPI_ISL_1384881, EPI_ISL_1384882, EPI_ISL_1384883, EPI_ISL_1384884                                                                                                                                                                                                                                                                                                                                                                                                                                                                                                                                                                                                                                                                                                                                                                                                                                                                                                                                                                                                                                                                                                                                                                                                                                                                                                                                                                                                                                                                                                                                                                                                                                                                                                                                                                                                                                                                                                                                                                                                                                                                                                                                                                                                                                                                                                                                                                                                                                                                                                                                                                                                                                                                                         | see above                                          | National Centre For Cell Science                                           | National Centre For Cell Science - INSACOG                                                                                                                                                                                                  | Dhiraj Paul, Mitali Inamdar, Sonal Manik Chavan, Mohak P Gujare, Shivang P. Bhanushali, Manoj Kumar Bhat, Ajay Pillai, INSACOG Consortium team, Yogesh Shouche. |
| EPI_ISL_1385826, EPI_ISL_1385828                                                                                                                                                                                                                                                                                                                                                                                                                                                                                                                                                                                                                                                                                                                                                                                                                                                                                                                                                                                                                                                                                                                                                                                                                                                                                                                                                                                                                                                                                                                                                                                                                                                                                                                                                                                                                                                                                                                                                                                                                                                                                                                                                                                                                                                                                                                                                                                                                                                                                                                                                                                                                                                                                                                                                                                                                                                                                                                                                                                                                            | see above                                          | BBMP Urban PHC                                                             | INSACOG-KA, NIMHANS                                                                                                                                                                                                                         | Chitra Pattabiraman, Pramada Prasad, Anson Kunjumon George, Darshan Sreenivas, Nakka Vijay Kiran Reddy, Anita S Desai, V Ravi                                   |
| EPI_ISL_1415161, EPI_ISL_1415162, EPI_ISL_1415163, EPI_ISL_1415164, EPI_ISL_1415165, EPI_ISL_1415166, EPI_ISL_1415167, EPI_ISL_1415172, EPI_ISL_1415174, EPI_ISL_1415176, EPI_ISL_1415178, EPI_ISL_1415181, EPI_ISL_1415182, EPI_ISL_1415183, EPI_ISL_1415184, EPI_ISL_1415188, EPI_ISL_1415190, EPI_ISL_1415191, EPI_ISL_1415194, EPI_ISL_1415195, EPI_ISL_1415196, EPI_ISL_1415198, EPI_ISL_1415199, EPI_ISL_1415200, EPI_ISL_1415202, EPI_ISL_1415203, EPI_ISL_1415204, EPI_ISL_1415205, EPI_ISL_1415208, EPI_ISL_1415209, EPI_ISL_1415212, EPI_ISL_1415217, EPI_ISL_1415218, EPI_ISL_1415219, EPI_ISL_1415220, EPI_ISL_1415221, EPI_ISL_1415222, EPI_ISL_1415223, EPI_ISL_1415224, EPI_ISL_1415225, EPI_ISL_1415226, EPI_ISL_1415227, EPI_ISL_1415229, EPI_ISL_1415231, EPI_ISL_1415232, EPI_ISL_1415233, EPI_ISL_1415237, EPI_ISL_1415238, EPI_ISL_1415239, EPI_ISL_1415240, EPI_ISL_1415241, EPI_ISL_1415242, EPI_ISL_1415244, EPI_ISL_1415245, EPI_ISL_1415247, EPI_ISL_1415248, EPI_ISL_1415249, EPI_ISL_1415250, EPI_ISL_1415251, EPI_ISL_1415252, EPI_ISL_1415253, EPI_ISL_1415254, EPI_ISL_1415257, EPI_ISL_1415259, EPI_ISL_1415260, EPI_ISL_1415261, EPI_ISL_1415262, EPI_ISL_1415263, EPI_ISL_1415264, EPI_ISL_1415265, EPI_ISL_1415266, EPI_ISL_1415267, EPI_ISL_1415269, EPI_ISL_1415271, EPI_ISL_1415272, EPI_ISL_1415273, EPI_ISL_1415275, EPI_ISL_1415276, EPI_ISL_1415277, EPI_ISL_1415278, EPI_ISL_1415279, EPI_ISL_1415280, EPI_ISL_1415281, EPI_ISL_1415282, EPI_ISL_1415283, EPI_ISL_1415284, EPI_ISL_1415286, EPI_ISL_1415287, EPI_ISL_1415288, EPI_ISL_1415289, EPI_ISL_1415290, EPI_ISL_1415291, EPI_ISL_1415292, EPI_ISL_1415294, EPI_ISL_1415295, EPI_ISL_1415296, EPI_ISL_1415297, EPI_ISL_1415299, EPI_ISL_1415300, EPI_ISL_1415302, EPI_ISL_1415303, EPI_ISL_1415304, EPI_ISL_1415305, EPI_ISL_1415306, EPI_ISL_1415307, EPI_ISL_1415308, EPI_ISL_1415309, EPI_ISL_1415310, EPI_ISL_1415311, EPI_ISL_1415312, EPI_ISL_1415313, EPI_ISL_1415314, EPI_ISL_1415315, EPI_ISL_1415316, EPI_ISL_1415317, EPI_ISL_1415318, EPI_ISL_1415319, EPI_ISL_1415320, EPI_ISL_1415321, EPI_ISL_1415323, EPI_ISL_1415324, EPI_ISL_1415327, EPI_ISL_1415331, EPI_ISL_1415332, EPI_ISL_1415334, EPI_ISL_1415335, EPI_ISL_1415341, EPI_ISL_1415343, EPI_ISL_1415345, EPI_ISL_1415350, EPI_ISL_1415351, EPI_ISL_1415353, EPI_ISL_1415355, EPI_ISL_1415356, EPI_ISL_1415357, EPI_ISL_1415358, EPI_ISL_1415361, EPI_ISL_1415362, EPI_ISL_1415363, EPI_ISL_1415365, EPI_ISL_1415366, EPI_ISL_1415367, EPI_ISL_1415368, EPI_ISL_1415369, EPI_ISL_1415370, EPI_ISL_1415371, EPI_ISL_1415372, EPI_ISL_1415376, EPI_ISL_1415377, EPI_ISL_1415378, EPI_ISL_1415379, EPI_ISL_1415380, EPI_ISL_1415383, EPI_ISL_1415385, EPI_ISL_1415386, EPI_ISL_1415387, EPI_ISL_1415388, EPI_ISL_1415389, EPI_ISL_1415390                                                                                                                                                                                                                                               | see above                                          | National Centre For Cell Science                                           | National Centre For Cell Science - INSACOG                                                                                                                                                                                                  | Dhiraj Paul, Mitali Inamdar, Sonal Manik Chavan, Mohak P Gujare, Shivang P. Bhanushali, Manoj Kumar Bhat, Ajay Pillai, INSACOG Consortium team, Yogesh Shouche. |
| EPI_ISL_1419052, EPI_ISL_1419147, EPI_ISL_1419149, EPI_ISL_1419150, EPI_ISL_1419151, EPI_ISL_1419154, EPI_ISL_1419159, EPI_ISL_1419164, EPI_ISL_1419166, EPI_ISL_1419167, EPI_ISL_1419168, EPI_ISL_1419169, EPI_ISL_1419192, EPI_ISL_1419193, EPI_ISL_1419194, EPI_ISL_1419195, EPI_ISL_1419197, EPI_ISL_1419204, EPI_ISL_1419234, EPI_ISL_1419235, EPI_ISL_1419250, EPI_ISL_1419293, EPI_ISL_1419295, EPI_ISL_1419297, EPI_ISL_1419298, EPI_ISL_1419347, EPI_ISL_1419351, EPI_ISL_1419352, EPI_ISL_1419354, EPI_ISL_1419409, EPI_ISL_1419410, EPI_ISL_1419411, EPI_ISL_1419414, EPI_ISL_1419415, EPI_ISL_1419416, EPI_ISL_1419419, EPI_ISL_1419425, EPI_ISL_1419427, EPI_ISL_1419485, EPI_ISL_1419496, EPI_ISL_1419497, EPI_ISL_1419501, EPI_ISL_1419511, EPI_ISL_1419512, EPI_ISL_1419515, EPI_ISL_1419519, EPI_ISL_1419520, EPI_ISL_1419521, EPI_ISL_1419522, EPI_ISL_1419523, EPI_ISL_1419524, EPI_ISL_1419525, EPI_ISL_1419528, EPI_ISL_1419529, EPI_ISL_1419530, EPI_ISL_1419531, EPI_ISL_1419538, EPI_ISL_1419541, EPI_ISL_1419542, EPI_ISL_1419543, EPI_ISL_1419544, EPI_ISL_1419545, EPI_ISL_1419546, EPI_ISL_1419547, EPI_ISL_1419548, EPI_ISL_1419549, EPI_ISL_1419550, EPI_ISL_1419551, EPI_ISL_1419552, EPI_ISL_1419553, EPI_ISL_1419554, EPI_ISL_1419555, EPI_ISL_1419556, EPI_ISL_1419557, EPI_ISL_1419558, EPI_ISL_1419559, EPI_ISL_1419560, EPI_ISL_1419561, EPI_ISL_1419562, EPI_ISL_1419564, EPI_ISL_1419566, EPI_ISL_1419567, EPI_ISL_1419571, EPI_ISL_1419572, EPI_ISL_1419573, EPI_ISL_1419575, EPI_ISL_1419577, EPI_ISL_1419578, EPI_ISL_1419598, EPI_ISL_1419600, EPI_ISL_1419607, EPI_ISL_1419608, EPI_ISL_1419612, EPI_ISL_1419613, EPI_ISL_1419615, EPI_ISL_1419617, EPI_ISL_1419620, EPI_ISL_1419623, EPI_ISL_1419629, EPI_ISL_1419630, EPI_ISL_1419635, EPI_ISL_1419638, EPI_ISL_1419639, EPI_ISL_1419640, EPI_ISL_1419641, EPI_ISL_1419642, EPI_ISL_1419643, EPI_ISL_1419644, EPI_ISL_1419645, EPI_ISL_1419646, EPI_ISL_1419647, EPI_ISL_1419648, EPI_ISL_1419655, EPI_ISL_1419671, EPI_ISL_1419673, EPI_ISL_1419674, EPI_ISL_1419676, EPI_ISL_1419677, EPI_ISL_1419678, EPI_ISL_1419688, EPI_ISL_1419690, EPI_ISL_1419738, EPI_ISL_1419741, EPI_ISL_1419744, EPI_ISL_1419745, EPI_ISL_1419746, EPI_ISL_1419747, EPI_ISL_1419748, EPI_ISL_1419749, EPI_ISL_1419753, EPI_ISL_1419754, EPI_ISL_1419756, EPI_ISL_1419759, EPI_ISL_1419760, EPI_ISL_1419766, EPI_ISL_1419767, EPI_ISL_1419768, EPI_ISL_1419769, EPI_ISL_1419770, EPI_ISL_1419771, EPI_ISL_1419774, EPI_ISL_1419775, EPI_ISL_1419777, EPI_ISL_1419780, EPI_ISL_1419781, EPI_ISL_1419785, EPI_ISL_1419791, EPI_ISL_1419792, EPI_ISL_1419794, EPI_ISL_1419797, EPI_ISL_1419799, EPI_ISL_1419802, EPI_ISL_1419804, EPI_ISL_1419805, EPI_ISL_1419806, EPI_ISL_1419809, EPI_ISL_1419810, EPI_ISL_1419847, EPI_ISL_1419848, EPI_ISL_1419849, EPI_ISL_1419850, EPI_ISL_1419853, EPI_ISL_1419883, EPI_ISL_1419884, EPI_ISL_1419892, EPI_ISL_1419893, EPI_ISL_1419894, EPI_ISL_1419895, EPI_ISL_1419909, EPI_ISL_1419911, EPI_ISL_1419918, EPI_ISL_1419919, EPI_ISL_1419921 | see above                                          | INSACOG-WB                                                                 | National Institute of Biomedical Genomics - INSACOG                                                                                                                                                                                         | Arindam Maitra, Bhaswati Bandyopadhyay, Nidhan Kumar Biswas, Tamal Ghosh, Sreedhar Chinnaswamy, Ajay Chakraborti, Saumitra Das                                  |
| EPI_ISL_1442947, EPI_ISL_1442952, EPI_ISL_1476997, EPI_ISL_1477003, EPI_ISL_1477006, EPI_ISL_1477037, EPI_ISL_1489717, EPI_ISL_1489718, EPI_ISL_1489719, EPI_ISL_1489721, EPI_ISL_1489722, EPI_ISL_1489723, EPI_ISL_1489725, EPI_ISL_1489726                                                                                                                                                                                                                                                                                                                                                                                                                                                                                                                                                                                                                                                                                                                                                                                                                                                                                                                                                                                                                                                                                                                                                                                                                                                                                                                                                                                                                                                                                                                                                                                                                                                                                                                                                                                                                                                                                                                                                                                                                                                                                                                                                                                                                                                                                                                                                                                                                                                                                                                                                                                                                                                                                                                                                                                                                | see above                                          | National Public Health Laboratory, National Centre for Infectious Diseases | National Public Health Laboratory, National Centre for Infectious Diseases                                                                                                                                                                  | Tze Minn Mak, Zhenyang Zhou, Grace Jie Yin Ngan, Royce Ang, Lin Cui, Raymond Tzer Pin Lin                                                                       |
| EPI_ISL_1511201, EPI_ISL_1511202                                                                                                                                                                                                                                                                                                                                                                                                                                                                                                                                                                                                                                                                                                                                                                                                                                                                                                                                                                                                                                                                                                                                                                                                                                                                                                                                                                                                                                                                                                                                                                                                                                                                                                                                                                                                                                                                                                                                                                                                                                                                                                                                                                                                                                                                                                                                                                                                                                                                                                                                                                                                                                                                                                                                                                                                                                                                                                                                                                                                                            | see above                                          | National Centre For Cell Science                                           | National Centre For Cell Science - INSACOG                                                                                                                                                                                                  | Dhiraj Paul, Sonal Manik Chavan, Mohak P Gujare, Shivang P. Bhanushali, Mitali Inamdar, Manoj Kumar Bhat, Ajay Pillai, INSACOG Consortium team, Yogesh Shouche  |
| EPI_ISL_1519384, EPI_ISL_1519396, EPI_ISL_1519405, EPI_ISL_1519407, EPI_ISL_1519413, EPI_ISL_1519419, EPI_ISL_1524777, EPI_ISL_1524778, EPI_ISL_1524780, EPI_ISL_1524781, EPI_ISL_1524782, EPI_ISL_1524785, EPI_ISL_1524786, EPI_ISL_1524789, EPI_ISL_1524791, EPI_ISL_1524793, EPI_ISL_1524794, EPI_ISL_1524796, EPI_ISL_1524797, EPI_ISL_1524799, EPI_ISL_1524800                                                                                                                                                                                                                                                                                                                                                                                                                                                                                                                                                                                                                                                                                                                                                                                                                                                                                                                                                                                                                                                                                                                                                                                                                                                                                                                                                                                                                                                                                                                                                                                                                                                                                                                                                                                                                                                                                                                                                                                                                                                                                                                                                                                                                                                                                                                                                                                                                                                                                                                                                                                                                                                                                         | see above                                          | National Public Health Laboratory, National Centre for Infectious Diseases | National Public Health Laboratory, National Centre for Infectious Diseases                                                                                                                                                                  | Tze Minn Mak, Zhenyang Zhou, Grace Jie Yin Ngan, Royce Ang, Lin Cui, Raymond Tzer Pin Lin                                                                       |
| EPI_ISL_1533738, EPI_ISL_1533742, EPI_ISL_1533743, EPI_ISL_1533744, EPI_ISL_1533745, EPI_ISL_1533746, EPI_ISL_1533747, EPI_ISL_1533748, EPI_ISL_1533750, EPI_ISL_1533752, EPI_ISL_1533753, EPI_ISL_1533754, EPI_ISL_1533755, EPI_ISL_1533756, EPI_ISL_1533758, EPI_ISL_1533762, EPI_ISL_1533763, EPI_ISL_1533771, EPI_ISL_1533778, EPI_ISL_1533780, EPI_ISL_1533783, EPI_ISL_1533784, EPI_ISL_1533785, EPI_ISL_1533790, EPI_ISL_1533791, EPI_ISL_1533792, EPI_ISL_1533793, EPI_ISL_1533794, EPI_ISL_1533795, EPI_ISL_1533796, EPI_ISL_1533798, EPI_ISL_1533799, EPI_ISL_1533800, EPI_ISL_1533801                                                                                                                                                                                                                                                                                                                                                                                                                                                                                                                                                                                                                                                                                                                                                                                                                                                                                                                                                                                                                                                                                                                                                                                                                                                                                                                                                                                                                                                                                                                                                                                                                                                                                                                                                                                                                                                                                                                                                                                                                                                                                                                                                                                                                                                                                                                                                                                                                                                            | see above                                          | National Centre For Cell Science                                           | National Centre For Cell Science - INSACOG                                                                                                                                                                                                  | Dhiraj Paul, Sonal Manik Chavan, Mohak P Gujare, Shivang P. Bhanushali, Mitali Inamdar, Manoj Kumar Bhat, Ajay Pillai, INSACOG Consortium team, Yogesh Shouche  |
| EPI_ISL_1540451, EPI_ISL_1540452, EPI_ISL_1540453, EPI_ISL_1540454, EPI_ISL_1540455, EPI_ISL_1540456, EPI_ISL_1540457                                                                                                                                                                                                                                                                                                                                                                                                                                                                                                                                                                                                                                                                                                                                                                                                                                                                                                                                                                                                                                                                                                                                                                                                                                                                                                                                                                                                                                                                                                                                                                                                                                                                                                                                                                                                                                                                                                                                                                                                                                                                                                                                                                                                                                                                                                                                                                                                                                                                                                                                                                                                                                                                                                                                                                                                                                                                                                                                       | see above                                          | National Centre For Cell Science                                           | National Centre For Cell Science - INSACOG                                                                                                                                                                                                  | Dhiraj Paul, Mohak P Gujare, Shivang P. Bhanushali, Mitali Inamdar, Sonal Manik Chavan, Manoj Kumar Bhat, Ajay Pillai, INSACOG Consortium team, Yogesh Shouche  |
| EPI_ISL_1543965, EPI_ISL_1543966, EPI_ISL_1543968, EPI_ISL_1543969, EPI_ISL_1543971, EPI_ISL_1543977, EPI_ISL_1543979, EPI_ISL_1543980, EPI_ISL_1543981                                                                                                                                                                                                                                                                                                                                                                                                                                                                                                                                                                                                                                                                                                                                                                                                                                                                                                                                                                                                                                                                                                                                                                                                                                                                                                                                                                                                                                                                                                                                                                                                                                                                                                                                                                                                                                                                                                                                                                                                                                                                                                                                                                                                                                                                                                                                                                                                                                                                                                                                                                                                                                                                                                                                                                                                                                                                                                     | see above                                          | National Public Health Laboratory, National Centre for Infectious Diseases | National Public Health Laboratory, National Centre for Infectious Diseases                                                                                                                                                                  | Tze Minn Mak, Zhenyang Zhou, Grace Jie Yin Ngan, Royce Ang, Lin Cui, Raymond Tzer Pin Lin                                                                       |
| EPI_ISL_1543989, EPI_ISL_1543991, EPI_ISL_1543992, EPI_ISL_1543994, EPI_ISL_1543995, EPI_ISL_1543996, EPI_ISL_1543997, EPI_ISL_1543998, EPI_ISL_1543999, EPI_ISL_1544003, EPI_ISL_1544004, EPI_ISL_1544006, EPI_ISL_1544008, EPI_ISL_1544009, EPI_ISL_1544011, EPI_ISL_1544013, EPI_ISL_1544017, EPI_ISL_1544019, EPI_ISL_1544025, EPI_ISL_1544026, EPI_ISL_1544027, EPI_ISL_1544028, EPI_ISL_1544029, EPI_ISL_1544030, EPI_ISL_1544031, EPI_ISL_1544033, EPI_ISL_1544034, EPI_ISL_1544036, EPI_ISL_1544037, EPI_ISL_1544040, EPI_ISL_1544042, EPI_ISL_1544043, EPI_ISL_1544044, EPI_ISL_1544045, EPI_ISL_1544046, EPI_ISL_1544048, EPI_ISL_1544050, EPI_ISL_1544051, EPI_ISL_1544052, EPI_ISL_1544055, EPI_ISL_1544061, EPI_ISL_1544062, EPI_ISL_1544063, EPI_ISL_1544064, EPI_ISL_1544065, EPI_ISL_1544067, EPI_ISL_1544068, EPI_ISL_1544071                                                                                                                                                                                                                                                                                                                                                                                                                                                                                                                                                                                                                                                                                                                                                                                                                                                                                                                                                                                                                                                                                                                                                                                                                                                                                                                                                                                                                                                                                                                                                                                                                                                                                                                                                                                                                                                                                                                                                                                                                                                                                                                                                                                                              | see above                                          | National Centre For Cell Science                                           | National Centre For Cell Science - INSACOG                                                                                                                                                                                                  | Dhiraj Paul, Mohak P Gujare, Shivang P. Bhanushali, Mitali Inamdar, Sonal Manik Chavan, Manoj Kumar Bhat, Ajay Pillai, INSACOG Consortium team, Yogesh Shouche  |
| EPI_ISL_1544110                                                                                                                                                                                                                                                                                                                                                                                                                                                                                                                                                                                                                                                                                                                                                                                                                                                                                                                                                                                                                                                                                                                                                                                                                                                                                                                                                                                                                                                                                                                                                                                                                                                                                                                                                                                                                                                                                                                                                                                                                                                                                                                                                                                                                                                                                                                                                                                                                                                                                                                                                                                                                                                                                                                                                                                                                                                                                                                                                                                                                                             | B.J. Medical College and Civil hospital, Ahmedabad | Gujarat Biotechnology Research Centre                                      | Pranay Shah, Zuber Saiyed, Ramesh Pandit, Janvi Raval, Zarna Patel, Nitin Savaliya, Dinesh Kumar, Twinkle Soni, Sonal Sharma, Kamlesh J Upadhyay, Sanjay Kapadia, Dipa Kinariwala, Umang Mishra, Nitesh Shah, Chaitanya Joshi, Madhvi Joshi |                                                                                                                                                                 |
| EPI_ISL_1544111                                                                                                                                                                                                                                                                                                                                                                                                                                                                                                                                                                                                                                                                                                                                                                                                                                                                                                                                                                                                                                                                                                                                                                                                                                                                                                                                                                                                                                                                                                                                                                                                                                                                                                                                                                                                                                                                                                                                                                                                                                                                                                                                                                                                                                                                                                                                                                                                                                                                                                                                                                                                                                                                                                                                                                                                                                                                                                                                                                                                                                             | B.J. Medical College and Civil hospital, Ahmedabad | Gujarat Biotechnology Research Centre                                      | Kamlesh J Upadhyay, Ramesh Pandit, Janvi Raval, Zarna Patel, Nitin Savaliya, Dinesh Kumar, Twinkle Soni, Sonal Sharma, Zuber Saiyed, Pranay Shah, Sanjay Kapadia, Dipa Kinariwala, Umang Mishra, Nitesh Shah, Chaitanya Joshi, Madhvi Joshi |                                                                                                                                                                 |
| EPI_ISL_1544112                                                                                                                                                                                                                                                                                                                                                                                                                                                                                                                                                                                                                                                                                                                                                                                                                                                                                                                                                                                                                                                                                                                                                                                                                                                                                                                                                                                                                                                                                                                                                                                                                                                                                                                                                                                                                                                                                                                                                                                                                                                                                                                                                                                                                                                                                                                                                                                                                                                                                                                                                                                                                                                                                                                                                                                                                                                                                                                                                                                                                                             | B.J. Medical College and Civil hospital, Ahmedabad | Gujarat Biotechnology Research Centre                                      | Sanjay Kapadia, Janvi Raval, Zarna Patel, Nitin Savaliya, Dinesh Kumar, Twinkle Soni, Sonal Sharma, Zuber Saiyed, Ramesh Pandit, Pranay Shah, Kamlesh J Upadhyay, Dipa Kinariwala, Umang Mishra, Nitesh Shah, Chaitanya Joshi, Madhvi Joshi |                                                                                                                                                                 |
| EPI_ISL_1544113                                                                                                                                                                                                                                                                                                                                                                                                                                                                                                                                                                                                                                                                                                                                                                                                                                                                                                                                                                                                                                                                                                                                                                                                                                                                                                                                                                                                                                                                                                                                                                                                                                                                                                                                                                                                                                                                                                                                                                                                                                                                                                                                                                                                                                                                                                                                                                                                                                                                                                                                                                                                                                                                                                                                                                                                                                                                                                                                                                                                                                             | B.J. Medical College and Civil hospital, Ahmedabad | Gujarat Biotechnology Research Centre                                      | Dipa Kinariwala, Zarna Patel, Nitin Savaliya, Dinesh Kumar, Twinkle Soni, Sonal Sharma, Zuber Saiyed, Ramesh Pandit, Janvi Raval, Pranay Shah, Kamlesh J Upadhyay, Sanjay Kapadia, Umang Mishra, Nitesh Shah, Chaitanya Joshi, Madhvi Joshi |                                                                                                                                                                 |
| EPI_ISL_1544114                                                                                                                                                                                                                                                                                                                                                                                                                                                                                                                                                                                                                                                                                                                                                                                                                                                                                                                                                                                                                                                                                                                                                                                                                                                                                                                                                                                                                                                                                                                                                                                                                                                                                                                                                                                                                                                                                                                                                                                                                                                                                                                                                                                                                                                                                                                                                                                                                                                                                                                                                                                                                                                                                                                                                                                                                                                                                                                                                                                                                                             | B.J. Medical College and Civil hospital, Ahmedabad | Gujarat Biotechnology Research Centre                                      | Umang Mishra, Nitin Savaliya, Dinesh Kumar, Twinkle Soni, Sonal Sharma, Zuber Saiyed, Ramesh Pandit, Janvi Raval, Zarna Patel, Pranay Shah, Kamlesh J Upadhyay, Sanjay Kapadia, Dipa Kinariwala, Nitesh Shah, Chaitanya Joshi, Madhvi Joshi |                                                                                                                                                                 |
| EPI_ISL_1544115                                                                                                                                                                                                                                                                                                                                                                                                                                                                                                                                                                                                                                                                                                                                                                                                                                                                                                                                                                                                                                                                                                                                                                                                                                                                                                                                                                                                                                                                                                                                                                                                                                                                                                                                                                                                                                                                                                                                                                                                                                                                                                                                                                                                                                                                                                                                                                                                                                                                                                                                                                                                                                                                                                                                                                                                                                                                                                                                                                                                                                             | B.J. Medical College and Civil hospital, Ahmedabad | Gujarat Biotechnology Research Centre                                      | Umang Mishra, Dinesh Kumar, Twinkle Soni, Sonal Sharma, Zuber Saiyed, Ramesh Pandit, Janvi Raval, Zarna Patel, Nitin Savaliya, Pranay Shah, Kamlesh J Upadhyay, Sanjay Kapadia, Dipa Kinariwala, Nitesh Shah, Chaitanya Joshi, Madhvi Joshi |                                                                                                                                                                 |
| EPI_ISL_1544116                                                                                                                                                                                                                                                                                                                                                                                                                                                                                                                                                                                                                                                                                                                                                                                                                                                                                                                                                                                                                                                                                                                                                                                                                                                                                                                                                                                                                                                                                                                                                                                                                                                                                                                                                                                                                                                                                                                                                                                                                                                                                                                                                                                                                                                                                                                                                                                                                                                                                                                                                                                                                                                                                                                                                                                                                                                                                                                                                                                                                                             | B.J. Medical College and Civil hospital, Ahmedabad | Gujarat Biotechnology Research Centre                                      | Nitesh Shah, Twinkle Soni, Sonal Sharma, Zuber Saiyed, Ramesh Pandit, Janvi Raval, Zarna Patel, Nitin Savaliya, Dinesh Kumar, Pranay Shah, Kamlesh J                                                                                        |                                                                                                                                                                 |

|                                                                                                                                                                                                                                                                                                                                                                                                                                                                                                                                                                                                                                                                                                                                                                                                                                                                                                                                                                                                                                                                                                                                                                                                                                                                                                                                                                                                                                                                                                                                                                                                                                                                                                                                                                                                                                                                                                                                                                                                                                                                                                                                                                                                                                                                                                                                                                                                                                                                                                                                                                                                                                                                                                                                                                                                                                                                                                                                                                                                                                                                                                                                                                                                                                                                                                                                                                                                                                                                                                                                                                                                                                                                                                                                                                                                                                         |                                                                                                                                        |                                                                                                                                        |                                                                                                                                                                                                                                     |
|-----------------------------------------------------------------------------------------------------------------------------------------------------------------------------------------------------------------------------------------------------------------------------------------------------------------------------------------------------------------------------------------------------------------------------------------------------------------------------------------------------------------------------------------------------------------------------------------------------------------------------------------------------------------------------------------------------------------------------------------------------------------------------------------------------------------------------------------------------------------------------------------------------------------------------------------------------------------------------------------------------------------------------------------------------------------------------------------------------------------------------------------------------------------------------------------------------------------------------------------------------------------------------------------------------------------------------------------------------------------------------------------------------------------------------------------------------------------------------------------------------------------------------------------------------------------------------------------------------------------------------------------------------------------------------------------------------------------------------------------------------------------------------------------------------------------------------------------------------------------------------------------------------------------------------------------------------------------------------------------------------------------------------------------------------------------------------------------------------------------------------------------------------------------------------------------------------------------------------------------------------------------------------------------------------------------------------------------------------------------------------------------------------------------------------------------------------------------------------------------------------------------------------------------------------------------------------------------------------------------------------------------------------------------------------------------------------------------------------------------------------------------------------------------------------------------------------------------------------------------------------------------------------------------------------------------------------------------------------------------------------------------------------------------------------------------------------------------------------------------------------------------------------------------------------------------------------------------------------------------------------------------------------------------------------------------------------------------------------------------------------------------------------------------------------------------------------------------------------------------------------------------------------------------------------------------------------------------------------------------------------------------------------------------------------------------------------------------------------------------------------------------------------------------------------------------------------------------|----------------------------------------------------------------------------------------------------------------------------------------|----------------------------------------------------------------------------------------------------------------------------------------|-------------------------------------------------------------------------------------------------------------------------------------------------------------------------------------------------------------------------------------|
|                                                                                                                                                                                                                                                                                                                                                                                                                                                                                                                                                                                                                                                                                                                                                                                                                                                                                                                                                                                                                                                                                                                                                                                                                                                                                                                                                                                                                                                                                                                                                                                                                                                                                                                                                                                                                                                                                                                                                                                                                                                                                                                                                                                                                                                                                                                                                                                                                                                                                                                                                                                                                                                                                                                                                                                                                                                                                                                                                                                                                                                                                                                                                                                                                                                                                                                                                                                                                                                                                                                                                                                                                                                                                                                                                                                                                                         |                                                                                                                                        |                                                                                                                                        | Upadhyay,Sanjay Kapadia,Dipa Kinariwala,U mang Mishra,Chaitanya Joshi, Madhvi Joshi                                                                                                                                                 |
| EPI_ISL_1544117                                                                                                                                                                                                                                                                                                                                                                                                                                                                                                                                                                                                                                                                                                                                                                                                                                                                                                                                                                                                                                                                                                                                                                                                                                                                                                                                                                                                                                                                                                                                                                                                                                                                                                                                                                                                                                                                                                                                                                                                                                                                                                                                                                                                                                                                                                                                                                                                                                                                                                                                                                                                                                                                                                                                                                                                                                                                                                                                                                                                                                                                                                                                                                                                                                                                                                                                                                                                                                                                                                                                                                                                                                                                                                                                                                                                                         | B.J. Medical College and Civil hospital, Ahmedabad                                                                                     | Gujarat Biotechnology Research Centre                                                                                                  | Nitesh Shah,Sonal Sharma ,Zuber Saiyed,Ramesh Pandit,Janvi Raval,Zarna Patel,Nitin Savaliya,Dinesh Kumar,Twinkle Soni,Pranay Shah,Kamlesh J Upadhyay,Sanjay Kapadia,Dipa Kinariwala,U mang Mishra,Chaitanya Joshi, Madhvi Joshi     |
| EPI_ISL_1544133                                                                                                                                                                                                                                                                                                                                                                                                                                                                                                                                                                                                                                                                                                                                                                                                                                                                                                                                                                                                                                                                                                                                                                                                                                                                                                                                                                                                                                                                                                                                                                                                                                                                                                                                                                                                                                                                                                                                                                                                                                                                                                                                                                                                                                                                                                                                                                                                                                                                                                                                                                                                                                                                                                                                                                                                                                                                                                                                                                                                                                                                                                                                                                                                                                                                                                                                                                                                                                                                                                                                                                                                                                                                                                                                                                                                                         | GMERS, Medical College, Gandhinagar                                                                                                    | Gujarat Biotechnology Research Centre                                                                                                  | Gaurishankar Shrimali,Sonal Sharma ,Zuber Saiyed,Ramesh Pandit,Janvi Raval,Zarna Patel,Nitin Savaliya,Dinesh Kumar,Twinkle Soni,U mang Mishra,Nitesh Shah,Chaitanya Joshi, Madhvi Joshi                                             |
| EPI_ISL_1544134                                                                                                                                                                                                                                                                                                                                                                                                                                                                                                                                                                                                                                                                                                                                                                                                                                                                                                                                                                                                                                                                                                                                                                                                                                                                                                                                                                                                                                                                                                                                                                                                                                                                                                                                                                                                                                                                                                                                                                                                                                                                                                                                                                                                                                                                                                                                                                                                                                                                                                                                                                                                                                                                                                                                                                                                                                                                                                                                                                                                                                                                                                                                                                                                                                                                                                                                                                                                                                                                                                                                                                                                                                                                                                                                                                                                                         | GMERS, Medical College, Gandhinagar                                                                                                    | Gujarat Biotechnology Research Centre                                                                                                  | Zuber Saiyed,Ramesh Pandit,Janvi Raval,Zarna Patel,Nitin Savaliya,Dinesh Kumar,Sonal Sharma ,Gaurishankar Shrimali,U mang Mishra,Nitesh Shah,Chaitanya Joshi, Madhvi Joshi                                                          |
| EPI_ISL_1547802, EPI_ISL_1547803, EPI_ISL_1547804, EPI_ISL_1547805                                                                                                                                                                                                                                                                                                                                                                                                                                                                                                                                                                                                                                                                                                                                                                                                                                                                                                                                                                                                                                                                                                                                                                                                                                                                                                                                                                                                                                                                                                                                                                                                                                                                                                                                                                                                                                                                                                                                                                                                                                                                                                                                                                                                                                                                                                                                                                                                                                                                                                                                                                                                                                                                                                                                                                                                                                                                                                                                                                                                                                                                                                                                                                                                                                                                                                                                                                                                                                                                                                                                                                                                                                                                                                                                                                      | CSIR-National Environmental Engineering Research Institute                                                                             | CSIR-Centre for Cellular and Molecular Biology - INSACOG                                                                               | Onkar Kulkarni, Lamuk Zaveri, Ara Sreenivas, Sofia Banu, Shreekant Verma, Amareshwar Vodapalli , Viswagithe S L, B Himasri, Sharath Chandra Thota, Karthik Bharadwaj Tallapaka, Krishna Khairnar, Rakesh K Mishra,Divya Tej Sowpati |
| EPI_ISL_1568432                                                                                                                                                                                                                                                                                                                                                                                                                                                                                                                                                                                                                                                                                                                                                                                                                                                                                                                                                                                                                                                                                                                                                                                                                                                                                                                                                                                                                                                                                                                                                                                                                                                                                                                                                                                                                                                                                                                                                                                                                                                                                                                                                                                                                                                                                                                                                                                                                                                                                                                                                                                                                                                                                                                                                                                                                                                                                                                                                                                                                                                                                                                                                                                                                                                                                                                                                                                                                                                                                                                                                                                                                                                                                                                                                                                                                         | National Public Health Laboratory, National Centre for Infectious Diseases                                                             | National Public Health Laboratory, National Centre for Infectious Diseases                                                             | Tze Minn Mak, Zhenyang Zhou, Grace Jie Yin Ngan, Royce Ang, Lin Cui, Raymond Tzer Pin Lin                                                                                                                                           |
| EPI_ISL_1589745, EPI_ISL_1589747, EPI_ISL_1589748, EPI_ISL_1589749, EPI_ISL_1589750, EPI_ISL_1589751, EPI_ISL_1589752, EPI_ISL_1589753, EPI_ISL_1589754, EPI_ISL_1589755, EPI_ISL_1589756, EPI_ISL_1589757, EPI_ISL_1589758, EPI_ISL_1589759, EPI_ISL_1589760, EPI_ISL_1589761, EPI_ISL_1589762, EPI_ISL_1589763, EPI_ISL_1589764, EPI_ISL_1589765, EPI_ISL_1589766, EPI_ISL_1589767, EPI_ISL_1589768, EPI_ISL_1589769, EPI_ISL_1589770, EPI_ISL_1589771, EPI_ISL_1589772, EPI_ISL_1589773, EPI_ISL_1589774, EPI_ISL_1589775, EPI_ISL_1589776, EPI_ISL_1589777, EPI_ISL_1589778, EPI_ISL_1589779, EPI_ISL_1589780, EPI_ISL_1589781, EPI_ISL_1589782, EPI_ISL_1589783, EPI_ISL_1589784, EPI_ISL_1589785, EPI_ISL_1589786, EPI_ISL_1589787, EPI_ISL_1589788, EPI_ISL_1589789, EPI_ISL_1589790, EPI_ISL_1589791, EPI_ISL_1589792, EPI_ISL_1589795, EPI_ISL_1589796, EPI_ISL_1589797, EPI_ISL_1589798, EPI_ISL_1589799, EPI_ISL_1589800, EPI_ISL_1589801, EPI_ISL_1589802, EPI_ISL_1589803, EPI_ISL_1589804, EPI_ISL_1589805, EPI_ISL_1589806, EPI_ISL_1589807, EPI_ISL_1589808, EPI_ISL_1589809, EPI_ISL_1589810, EPI_ISL_1589811, EPI_ISL_1589812, EPI_ISL_1589813, EPI_ISL_1589814, EPI_ISL_1589815, EPI_ISL_1589816, EPI_ISL_1589817, EPI_ISL_1589818, EPI_ISL_1589819, EPI_ISL_1589820, EPI_ISL_1589821, EPI_ISL_1589822, EPI_ISL_1589853, EPI_ISL_1589854, EPI_ISL_1589857, EPI_ISL_1589858, EPI_ISL_1589859, EPI_ISL_1589860, EPI_ISL_1589861, EPI_ISL_1589862, EPI_ISL_1589863, EPI_ISL_1589864, EPI_ISL_1589865, EPI_ISL_1589866, EPI_ISL_1589867, EPI_ISL_1589871, EPI_ISL_1589872, EPI_ISL_1589873, EPI_ISL_1589874, EPI_ISL_1589875, EPI_ISL_1589876, EPI_ISL_1589877, EPI_ISL_1589878, EPI_ISL_1589879, EPI_ISL_1589880, EPI_ISL_1589881, EPI_ISL_1589882, EPI_ISL_1589883, EPI_ISL_1589884, EPI_ISL_1589885, EPI_ISL_1589886, EPI_ISL_1589887, EPI_ISL_1589888, EPI_ISL_1589889, EPI_ISL_1589890, EPI_ISL_1589891, EPI_ISL_1589892, EPI_ISL_1589893, EPI_ISL_1589894, EPI_ISL_1589895, EPI_ISL_1589896, EPI_ISL_1589897, EPI_ISL_1589898, EPI_ISL_1589899, EPI_ISL_1589900, EPI_ISL_1589901, EPI_ISL_1589902, EPI_ISL_1589903, EPI_ISL_1589904, EPI_ISL_1589905, EPI_ISL_1589906, EPI_ISL_1589907, EPI_ISL_1589908, EPI_ISL_1589909, EPI_ISL_1589910, EPI_ISL_1589911, EPI_ISL_1589912, EPI_ISL_1589913, EPI_ISL_1589914, EPI_ISL_1589915, EPI_ISL_1589916, EPI_ISL_1589917, EPI_ISL_1589918, EPI_ISL_1589919, EPI_ISL_1589920, EPI_ISL_1589921, EPI_ISL_1589922, EPI_ISL_1589923, EPI_ISL_1589924, EPI_ISL_1589925, EPI_ISL_1589926, EPI_ISL_1589927, EPI_ISL_1589928, EPI_ISL_1589929, EPI_ISL_1589930, EPI_ISL_1589931, EPI_ISL_1589932, EPI_ISL_1589933, EPI_ISL_1589934, EPI_ISL_1589935, EPI_ISL_1589936, EPI_ISL_1589937, EPI_ISL_1589938, EPI_ISL_1589939, EPI_ISL_1589940, EPI_ISL_1589941, EPI_ISL_1589942, EPI_ISL_1589943, EPI_ISL_1589944, EPI_ISL_1589945, EPI_ISL_1589946, EPI_ISL_1589947, EPI_ISL_1589948, EPI_ISL_1589949, EPI_ISL_1589950, EPI_ISL_1589951, EPI_ISL_1589952, EPI_ISL_1589953, EPI_ISL_1589954, EPI_ISL_1589955, EPI_ISL_1589956, EPI_ISL_1589957, EPI_ISL_1589958, EPI_ISL_1589959, EPI_ISL_1589960, EPI_ISL_1589961, EPI_ISL_1589962, EPI_ISL_1589963, EPI_ISL_1589964, EPI_ISL_1589965, EPI_ISL_1589966, EPI_ISL_1589967, EPI_ISL_1589968, EPI_ISL_1589969, EPI_ISL_1589970, EPI_ISL_1589971, EPI_ISL_1589972, EPI_ISL_1589973, EPI_ISL_1589974, EPI_ISL_1589975, EPI_ISL_1589976, EPI_ISL_1589977, EPI_ISL_1589978, EPI_ISL_1589979, EPI_ISL_1589980, EPI_ISL_1589981, EPI_ISL_1589982, EPI_ISL_1589983, EPI_ISL_1589984, EPI_ISL_1589985, EPI_ISL_1589986, EPI_ISL_1589987, EPI_ISL_1589988, EPI_ISL_1589989, EPI_ISL_1589990, EPI_ISL_1589991, EPI_ISL_1589992, EPI_ISL_1589993, EPI_ISL_1589994, EPI_ISL_1589995, EPI_ISL_1589996, EPI_ISL_1589997, EPI_ISL_1589998, EPI_ISL_1589999 |                                                                                                                                        |                                                                                                                                        |                                                                                                                                                                                                                                     |
| see above                                                                                                                                                                                                                                                                                                                                                                                                                                                                                                                                                                                                                                                                                                                                                                                                                                                                                                                                                                                                                                                                                                                                                                                                                                                                                                                                                                                                                                                                                                                                                                                                                                                                                                                                                                                                                                                                                                                                                                                                                                                                                                                                                                                                                                                                                                                                                                                                                                                                                                                                                                                                                                                                                                                                                                                                                                                                                                                                                                                                                                                                                                                                                                                                                                                                                                                                                                                                                                                                                                                                                                                                                                                                                                                                                                                                                               | INSACOG-WB                                                                                                                             | National Institute of Biomedical Genomics - INSACOG                                                                                    | Arinand Maitra, Bhaswati Bandyopadhyay, Nidhan Kumar Biswas, Tamal Ghosh, Sreedhar Chinnaswamy, Ajay Chakraborti, Saumitra Das                                                                                                      |
| EPI_ISL_1595862                                                                                                                                                                                                                                                                                                                                                                                                                                                                                                                                                                                                                                                                                                                                                                                                                                                                                                                                                                                                                                                                                                                                                                                                                                                                                                                                                                                                                                                                                                                                                                                                                                                                                                                                                                                                                                                                                                                                                                                                                                                                                                                                                                                                                                                                                                                                                                                                                                                                                                                                                                                                                                                                                                                                                                                                                                                                                                                                                                                                                                                                                                                                                                                                                                                                                                                                                                                                                                                                                                                                                                                                                                                                                                                                                                                                                         | BBMP Urban PHC                                                                                                                         | INSACOG-KA, NIMHANS                                                                                                                    | Chitra Pattabiraman, Pramada Prasad, Anson Kunjumon George, Ananthapadmanabha Kotambail, Darshan Sreenivas, Chetan G K, Gautham Arunachal Udupi, Anita S Desai, V Ravi                                                              |
| EPI_ISL_1595866                                                                                                                                                                                                                                                                                                                                                                                                                                                                                                                                                                                                                                                                                                                                                                                                                                                                                                                                                                                                                                                                                                                                                                                                                                                                                                                                                                                                                                                                                                                                                                                                                                                                                                                                                                                                                                                                                                                                                                                                                                                                                                                                                                                                                                                                                                                                                                                                                                                                                                                                                                                                                                                                                                                                                                                                                                                                                                                                                                                                                                                                                                                                                                                                                                                                                                                                                                                                                                                                                                                                                                                                                                                                                                                                                                                                                         | BANGALORE MEDICAL COLLEGE AND RESEARCH INSTITUTE                                                                                       | INSACOG-KA, NIMHANS                                                                                                                    | Chitra Pattabiraman, Pramada Prasad, Anson Kunjumon George, Ananthapadmanabha Kotambail, Darshan Sreenivas, Chetan G K, Gautham Arunachal Udupi, Anita S Desai, V Ravi                                                              |
| EPI_ISL_1595882                                                                                                                                                                                                                                                                                                                                                                                                                                                                                                                                                                                                                                                                                                                                                                                                                                                                                                                                                                                                                                                                                                                                                                                                                                                                                                                                                                                                                                                                                                                                                                                                                                                                                                                                                                                                                                                                                                                                                                                                                                                                                                                                                                                                                                                                                                                                                                                                                                                                                                                                                                                                                                                                                                                                                                                                                                                                                                                                                                                                                                                                                                                                                                                                                                                                                                                                                                                                                                                                                                                                                                                                                                                                                                                                                                                                                         | WENLOCK HOSPITAL, MANGALORE                                                                                                            | INSACOG-KA, NIMHANS                                                                                                                    | Chitra Pattabiraman, Pramada Prasad, Anson Kunjumon George, Ananthapadmanabha Kotambail, Darshan Sreenivas, Chetan G K, Gautham Arunachal Udupi, Anita S Desai, V Ravi                                                              |
| EPI_ISL_1595896, EPI_ISL_1595897, EPI_ISL_1595899                                                                                                                                                                                                                                                                                                                                                                                                                                                                                                                                                                                                                                                                                                                                                                                                                                                                                                                                                                                                                                                                                                                                                                                                                                                                                                                                                                                                                                                                                                                                                                                                                                                                                                                                                                                                                                                                                                                                                                                                                                                                                                                                                                                                                                                                                                                                                                                                                                                                                                                                                                                                                                                                                                                                                                                                                                                                                                                                                                                                                                                                                                                                                                                                                                                                                                                                                                                                                                                                                                                                                                                                                                                                                                                                                                                       | KEMPEGOWDA INTERNATIONAL AIRPORT                                                                                                       | INSACOG-KA, NIMHANS                                                                                                                    | Chitra Pattabiraman, Pramada Prasad, Anson Kunjumon George, Ananthapadmanabha Kotambail, Darshan Sreenivas, Chetan G K, Gautham Arunachal Udupi, Anita S Desai, V Ravi                                                              |
| EPI_ISL_1595907, EPI_ISL_1595909, EPI_ISL_1595910, EPI_ISL_1595916                                                                                                                                                                                                                                                                                                                                                                                                                                                                                                                                                                                                                                                                                                                                                                                                                                                                                                                                                                                                                                                                                                                                                                                                                                                                                                                                                                                                                                                                                                                                                                                                                                                                                                                                                                                                                                                                                                                                                                                                                                                                                                                                                                                                                                                                                                                                                                                                                                                                                                                                                                                                                                                                                                                                                                                                                                                                                                                                                                                                                                                                                                                                                                                                                                                                                                                                                                                                                                                                                                                                                                                                                                                                                                                                                                      | BBMP Urban PHC                                                                                                                         | INSACOG-KA, NIMHANS                                                                                                                    | Chitra Pattabiraman, Pramada Prasad, Anson Kunjumon George, Ananthapadmanabha Kotambail, Darshan Sreenivas, Chetan G K, Gautham Arunachal Udupi, Anita S Desai, V Ravi                                                              |
| EPI_ISL_1620132, EPI_ISL_1620133, EPI_ISL_1620134, EPI_ISL_1620136, EPI_ISL_1620137, EPI_ISL_1620138, EPI_ISL_1620140, EPI_ISL_1620143, EPI_ISL_1620154, EPI_ISL_1620159, EPI_ISL_1620160, EPI_ISL_1620161, EPI_ISL_1620162, EPI_ISL_1620163, EPI_ISL_1620164, EPI_ISL_1620165, EPI_ISL_1620166, EPI_ISL_1620170                                                                                                                                                                                                                                                                                                                                                                                                                                                                                                                                                                                                                                                                                                                                                                                                                                                                                                                                                                                                                                                                                                                                                                                                                                                                                                                                                                                                                                                                                                                                                                                                                                                                                                                                                                                                                                                                                                                                                                                                                                                                                                                                                                                                                                                                                                                                                                                                                                                                                                                                                                                                                                                                                                                                                                                                                                                                                                                                                                                                                                                                                                                                                                                                                                                                                                                                                                                                                                                                                                                        |                                                                                                                                        |                                                                                                                                        |                                                                                                                                                                                                                                     |
| see above                                                                                                                                                                                                                                                                                                                                                                                                                                                                                                                                                                                                                                                                                                                                                                                                                                                                                                                                                                                                                                                                                                                                                                                                                                                                                                                                                                                                                                                                                                                                                                                                                                                                                                                                                                                                                                                                                                                                                                                                                                                                                                                                                                                                                                                                                                                                                                                                                                                                                                                                                                                                                                                                                                                                                                                                                                                                                                                                                                                                                                                                                                                                                                                                                                                                                                                                                                                                                                                                                                                                                                                                                                                                                                                                                                                                                               | National Public Health Laboratory, National Centre for Infectious Diseases                                                             | National Public Health Laboratory, National Centre for Infectious Diseases                                                             | Tze Minn Mak, Zhenyang Zhou, Grace Jie Yin Ngan, Royce Ang, Lin Cui, Raymond Tzer Pin Lin                                                                                                                                           |
| EPI_ISL_1622467                                                                                                                                                                                                                                                                                                                                                                                                                                                                                                                                                                                                                                                                                                                                                                                                                                                                                                                                                                                                                                                                                                                                                                                                                                                                                                                                                                                                                                                                                                                                                                                                                                                                                                                                                                                                                                                                                                                                                                                                                                                                                                                                                                                                                                                                                                                                                                                                                                                                                                                                                                                                                                                                                                                                                                                                                                                                                                                                                                                                                                                                                                                                                                                                                                                                                                                                                                                                                                                                                                                                                                                                                                                                                                                                                                                                                         | Division of Emerging Infectious Diseases, Bureau of Infectious Diseases Diagnosis Control, Korea Disease Control and Prevention Agency | Division of Emerging Infectious Diseases, Bureau of Infectious Diseases Diagnosis Control, Korea Disease Control and Prevention Agency | Ae Kyung Park, Il-Hwan Kim, Heui Man Kim, Jeong-Min Kim, Jeong-Ah Kim, Chae Young Lee, Jin Sun No, Eun-Jin Kim                                                                                                                      |
| EPI_ISL_1634423, EPI_ISL_1634424, EPI_ISL_1634425, EPI_ISL_1634426, EPI_ISL_1634427, EPI_ISL_1634431                                                                                                                                                                                                                                                                                                                                                                                                                                                                                                                                                                                                                                                                                                                                                                                                                                                                                                                                                                                                                                                                                                                                                                                                                                                                                                                                                                                                                                                                                                                                                                                                                                                                                                                                                                                                                                                                                                                                                                                                                                                                                                                                                                                                                                                                                                                                                                                                                                                                                                                                                                                                                                                                                                                                                                                                                                                                                                                                                                                                                                                                                                                                                                                                                                                                                                                                                                                                                                                                                                                                                                                                                                                                                                                                    | National Public Health Laboratory, National Centre for Infectious Diseases                                                             | National Public Health Laboratory, National Centre for Infectious Diseases                                                             | Tze Minn Mak, Zhenyang Zhou, Grace Jie Yin Ngan, Royce Ang, Lin Cui, Raymond Tzer Pin Lin                                                                                                                                           |
| EPI_ISL_1647348, EPI_ISL_1647349, EPI_ISL_1647350, EPI_ISL_1647351, EPI_ISL_1647352                                                                                                                                                                                                                                                                                                                                                                                                                                                                                                                                                                                                                                                                                                                                                                                                                                                                                                                                                                                                                                                                                                                                                                                                                                                                                                                                                                                                                                                                                                                                                                                                                                                                                                                                                                                                                                                                                                                                                                                                                                                                                                                                                                                                                                                                                                                                                                                                                                                                                                                                                                                                                                                                                                                                                                                                                                                                                                                                                                                                                                                                                                                                                                                                                                                                                                                                                                                                                                                                                                                                                                                                                                                                                                                                                     | Division of Emerging Infectious Diseases, Bureau of Infectious Diseases Diagnosis Control, Korea Disease Control and Prevention Agency | Division of Emerging Infectious Diseases, Bureau of Infectious Diseases Diagnosis Control, Korea Disease Control and Prevention Agency | Ae Kyung Park, Il-Hwan Kim, Heui Man Kim, Jeong-Min Kim, Jeong-Ah Kim, Chae Young Lee, Jin Sun No, Eun-Jin Kim                                                                                                                      |
| EPI_ISL_1652097, EPI_ISL_1652098, EPI_ISL_1652101, EPI_ISL_1652102, EPI_ISL_1652105, EPI_ISL_1652106, EPI_ISL_1652109, EPI_ISL_1652118, EPI_ISL_1652119, EPI_ISL_1652122, EPI_ISL_1652532                                                                                                                                                                                                                                                                                                                                                                                                                                                                                                                                                                                                                                                                                                                                                                                                                                                                                                                                                                                                                                                                                                                                                                                                                                                                                                                                                                                                                                                                                                                                                                                                                                                                                                                                                                                                                                                                                                                                                                                                                                                                                                                                                                                                                                                                                                                                                                                                                                                                                                                                                                                                                                                                                                                                                                                                                                                                                                                                                                                                                                                                                                                                                                                                                                                                                                                                                                                                                                                                                                                                                                                                                                               |                                                                                                                                        |                                                                                                                                        |                                                                                                                                                                                                                                     |
| see above                                                                                                                                                                                                                                                                                                                                                                                                                                                                                                                                                                                                                                                                                                                                                                                                                                                                                                                                                                                                                                                                                                                                                                                                                                                                                                                                                                                                                                                                                                                                                                                                                                                                                                                                                                                                                                                                                                                                                                                                                                                                                                                                                                                                                                                                                                                                                                                                                                                                                                                                                                                                                                                                                                                                                                                                                                                                                                                                                                                                                                                                                                                                                                                                                                                                                                                                                                                                                                                                                                                                                                                                                                                                                                                                                                                                                               | National Public Health Laboratory, National Centre for Infectious Diseases                                                             | National Public Health Laboratory, National Centre for Infectious Diseases                                                             | Tze Minn Mak, Zhenyang Zhou, Grace Jie Yin Ngan, Royce Ang, Lin Cui, Raymond Tzer Pin Lin                                                                                                                                           |
| EPI_ISL_1662269                                                                                                                                                                                                                                                                                                                                                                                                                                                                                                                                                                                                                                                                                                                                                                                                                                                                                                                                                                                                                                                                                                                                                                                                                                                                                                                                                                                                                                                                                                                                                                                                                                                                                                                                                                                                                                                                                                                                                                                                                                                                                                                                                                                                                                                                                                                                                                                                                                                                                                                                                                                                                                                                                                                                                                                                                                                                                                                                                                                                                                                                                                                                                                                                                                                                                                                                                                                                                                                                                                                                                                                                                                                                                                                                                                                                                         | REGIONAL VRDL, ICMR-RMRC BBSR                                                                                                          | Institute of Life Sciences - INSACOG                                                                                                   | Sunil K. Raghav, Safal Walia, Arup Ghosh, Atimukta Jha, Amol M. Kanampalliwar, Shifu Aggarwal, Rupesh Dash, Rajeeb Swain, Punit Prasad, INSACOG Consortium, Ajay Parida                                                             |
| EPI_ISL_1662270, EPI_ISL_1662271                                                                                                                                                                                                                                                                                                                                                                                                                                                                                                                                                                                                                                                                                                                                                                                                                                                                                                                                                                                                                                                                                                                                                                                                                                                                                                                                                                                                                                                                                                                                                                                                                                                                                                                                                                                                                                                                                                                                                                                                                                                                                                                                                                                                                                                                                                                                                                                                                                                                                                                                                                                                                                                                                                                                                                                                                                                                                                                                                                                                                                                                                                                                                                                                                                                                                                                                                                                                                                                                                                                                                                                                                                                                                                                                                                                                        | Molecular Laboratory, Vikash Multispeciality Hospital, Bargharh                                                                        | Institute of Life Sciences - INSACOG                                                                                                   | Sunil K. Raghav, Safal Walia, Arup Ghosh, Atimukta Jha, Amol M. Kanampalliwar, Shifu Aggarwal, Rupesh Dash, Rajeeb Swain, Punit Prasad, INSACOG Consortium, Ajay Parida                                                             |
| EPI_ISL_1662277, EPI_ISL_1662278, EPI_ISL_1662279, EPI_ISL_1662280, EPI_ISL_1662281                                                                                                                                                                                                                                                                                                                                                                                                                                                                                                                                                                                                                                                                                                                                                                                                                                                                                                                                                                                                                                                                                                                                                                                                                                                                                                                                                                                                                                                                                                                                                                                                                                                                                                                                                                                                                                                                                                                                                                                                                                                                                                                                                                                                                                                                                                                                                                                                                                                                                                                                                                                                                                                                                                                                                                                                                                                                                                                                                                                                                                                                                                                                                                                                                                                                                                                                                                                                                                                                                                                                                                                                                                                                                                                                                     | Nalanda Medical College & Hospital, Patna                                                                                              | Institute of Life Sciences - INSACOG                                                                                                   | Sunil K. Raghav, Safal Walia, Arup Ghosh, Atimukta Jha, Amol M. Kanampalliwar, Shifu Aggarwal, Rupesh Dash, Rajeeb Swain, Punit Prasad, INSACOG Consortium, Ajay Parida                                                             |
| EPI_ISL_1662282, EPI_ISL_1662283, EPI_ISL_1662284, EPI_ISL_1662285, EPI_ISL_1662286                                                                                                                                                                                                                                                                                                                                                                                                                                                                                                                                                                                                                                                                                                                                                                                                                                                                                                                                                                                                                                                                                                                                                                                                                                                                                                                                                                                                                                                                                                                                                                                                                                                                                                                                                                                                                                                                                                                                                                                                                                                                                                                                                                                                                                                                                                                                                                                                                                                                                                                                                                                                                                                                                                                                                                                                                                                                                                                                                                                                                                                                                                                                                                                                                                                                                                                                                                                                                                                                                                                                                                                                                                                                                                                                                     | Veer Surendra Sai Institute of Medical Sciences and Research, Burla, Sambalpur                                                         | Institute of Life Sciences - INSACOG                                                                                                   | Sunil K. Raghav, Safal Walia, Arup Ghosh, Atimukta Jha, Amol M. Kanampalliwar, Shifu Aggarwal, Rupesh Dash, Rajeeb Swain, Punit Prasad, INSACOG Consortium, Ajay Parida                                                             |
| EPI_ISL_1662288, EPI_ISL_1662289, EPI_ISL_1662291                                                                                                                                                                                                                                                                                                                                                                                                                                                                                                                                                                                                                                                                                                                                                                                                                                                                                                                                                                                                                                                                                                                                                                                                                                                                                                                                                                                                                                                                                                                                                                                                                                                                                                                                                                                                                                                                                                                                                                                                                                                                                                                                                                                                                                                                                                                                                                                                                                                                                                                                                                                                                                                                                                                                                                                                                                                                                                                                                                                                                                                                                                                                                                                                                                                                                                                                                                                                                                                                                                                                                                                                                                                                                                                                                                                       | Dept. Of Microbiology, Lt., Baliram Kashyap Memorial Govt. Medical college, Dimrapal, Jagdalpur                                        | Institute of Life Sciences - INSACOG                                                                                                   | Sunil K. Raghav, Safal Walia, Arup Ghosh, Atimukta Jha, Amol M. Kanampalliwar, Shifu Aggarwal, Rupesh Dash, Rajeeb Swain, Punit Prasad, INSACOG Consortium, Ajay Parida                                                             |
| EPI_ISL_1662293, EPI_ISL_1662294, EPI_ISL_1662295, EPI_ISL_1662296, EPI_ISL_1662297, EPI_ISL_1662298, EPI_ISL_1662299, EPI_ISL_1662300, EPI_ISL_1662301, EPI_ISL_1662302, EPI_ISL_1662303, EPI_ISL_1662304, EPI_ISL_1662305, EPI_ISL_1662306, EPI_ISL_1662307, EPI_ISL_1662308, EPI_ISL_1662309, EPI_ISL_1662310, EPI_ISL_1662311, EPI_ISL_1662312, EPI_ISL_1662313, EPI_ISL_1662314, EPI_ISL_1662315, EPI_ISL_1662317, EPI_ISL_1662319, EPI_ISL_1662320, EPI_ISL_1662323, EPI_ISL_1662324, EPI_ISL_1662325, EPI_ISL_1662326, EPI_ISL_1662327, EPI_ISL_1662329, EPI_ISL_1662330, EPI_ISL_1662331, EPI_ISL_1662332, EPI_ISL_1662333, EPI_ISL_1662334, EPI_ISL_1662335, EPI_ISL_1662336, EPI_ISL_1662338, EPI_ISL_1662339, EPI_ISL_1662340, EPI_ISL_1662341, EPI_ISL_1662342                                                                                                                                                                                                                                                                                                                                                                                                                                                                                                                                                                                                                                                                                                                                                                                                                                                                                                                                                                                                                                                                                                                                                                                                                                                                                                                                                                                                                                                                                                                                                                                                                                                                                                                                                                                                                                                                                                                                                                                                                                                                                                                                                                                                                                                                                                                                                                                                                                                                                                                                                                                                                                                                                                                                                                                                                                                                                                                                                                                                                                                              |                                                                                                                                        |                                                                                                                                        |                                                                                                                                                                                                                                     |
| see above                                                                                                                                                                                                                                                                                                                                                                                                                                                                                                                                                                                                                                                                                                                                                                                                                                                                                                                                                                                                                                                                                                                                                                                                                                                                                                                                                                                                                                                                                                                                                                                                                                                                                                                                                                                                                                                                                                                                                                                                                                                                                                                                                                                                                                                                                                                                                                                                                                                                                                                                                                                                                                                                                                                                                                                                                                                                                                                                                                                                                                                                                                                                                                                                                                                                                                                                                                                                                                                                                                                                                                                                                                                                                                                                                                                                                               | Pt. Jawahar Lal Nehru Memorial Medical College, Raipur, Chhattisgarh                                                                   | Institute of Life Sciences - INSACOG                                                                                                   | Sunil K. Raghav, Safal Walia, Arup Ghosh, Atimukta Jha, Amol M. Kanampalliwar, Shifu Aggarwal, Rupesh Dash, Rajeeb Swain, Punit Prasad, INSACOG Consortium, Ajay Parida                                                             |
| EPI_ISL_1662359, EPI_ISL_1662360, EPI_ISL_1662362, EPI_ISL_1662363, EPI_ISL_1662368, EPI_ISL_1662370, EPI_ISL_1662372, EPI_ISL_1662373, EPI_ISL_1662375, EPI_ISL_1662378, EPI_ISL_1662380, EPI_ISL_1662382                                                                                                                                                                                                                                                                                                                                                                                                                                                                                                                                                                                                                                                                                                                                                                                                                                                                                                                                                                                                                                                                                                                                                                                                                                                                                                                                                                                                                                                                                                                                                                                                                                                                                                                                                                                                                                                                                                                                                                                                                                                                                                                                                                                                                                                                                                                                                                                                                                                                                                                                                                                                                                                                                                                                                                                                                                                                                                                                                                                                                                                                                                                                                                                                                                                                                                                                                                                                                                                                                                                                                                                                                              |                                                                                                                                        |                                                                                                                                        |                                                                                                                                                                                                                                     |
| see above                                                                                                                                                                                                                                                                                                                                                                                                                                                                                                                                                                                                                                                                                                                                                                                                                                                                                                                                                                                                                                                                                                                                                                                                                                                                                                                                                                                                                                                                                                                                                                                                                                                                                                                                                                                                                                                                                                                                                                                                                                                                                                                                                                                                                                                                                                                                                                                                                                                                                                                                                                                                                                                                                                                                                                                                                                                                                                                                                                                                                                                                                                                                                                                                                                                                                                                                                                                                                                                                                                                                                                                                                                                                                                                                                                                                                               | Govt. Medical College, Ambikapur, Surguja                                                                                              | Institute of Life Sciences - INSACOG                                                                                                   | Sunil K. Raghav, Safal Walia, Arup Ghosh, Atimukta Jha, Amol M. Kanampalliwar, Shifu Aggarwal, Rupesh Dash, Rajeeb Swain, Punit Prasad, INSACOG Consortium, Ajay Parida                                                             |
| EPI_ISL_1662391, EPI_ISL_1662393, EPI_ISL_1662394, EPI_ISL_1662395, EPI_ISL_1662396, EPI_ISL_1662398, EPI_ISL_1662400, EPI_ISL_1662406, EPI_ISL_1662407, EPI_ISL_1662408, EPI_ISL_1662410, EPI_ISL_1662411, EPI_ISL_1662412, EPI_ISL_1662414, EPI_ISL_1662415, EPI_ISL_1662416, EPI_ISL_1662417, EPI_ISL_1662418, EPI_ISL_1662420                                                                                                                                                                                                                                                                                                                                                                                                                                                                                                                                                                                                                                                                                                                                                                                                                                                                                                                                                                                                                                                                                                                                                                                                                                                                                                                                                                                                                                                                                                                                                                                                                                                                                                                                                                                                                                                                                                                                                                                                                                                                                                                                                                                                                                                                                                                                                                                                                                                                                                                                                                                                                                                                                                                                                                                                                                                                                                                                                                                                                                                                                                                                                                                                                                                                                                                                                                                                                                                                                                       |                                                                                                                                        |                                                                                                                                        |                                                                                                                                                                                                                                     |
| see above                                                                                                                                                                                                                                                                                                                                                                                                                                                                                                                                                                                                                                                                                                                                                                                                                                                                                                                                                                                                                                                                                                                                                                                                                                                                                                                                                                                                                                                                                                                                                                                                                                                                                                                                                                                                                                                                                                                                                                                                                                                                                                                                                                                                                                                                                                                                                                                                                                                                                                                                                                                                                                                                                                                                                                                                                                                                                                                                                                                                                                                                                                                                                                                                                                                                                                                                                                                                                                                                                                                                                                                                                                                                                                                                                                                                                               | BRLSABVM Government Medical College, Rajnandgaon,                                                                                      | Institute of Life Sciences - INSACOG                                                                                                   | Sunil K. Raghav, Safal Walia, Arup Ghosh, Atimukta Jha, Amol M. Kanampalliwar, Shifu Aggarwal, Rupesh Dash, Rajeeb Swain, Punit Prasad, INSACOG Consortium, Ajay Parida                                                             |





EPI\_ISL\_1838418, EPI\_ISL\_1838430, EPI\_ISL\_1838446, EPI\_ISL\_1838448, EPI\_ISL\_1838452, EPI\_ISL\_1838454, EPI\_ISL\_1838455, EPI\_ISL\_1838456, EPI\_ISL\_1838457, EPI\_ISL\_1838459, EPI\_ISL\_1838460, EPI\_ISL\_1838464, EPI\_ISL\_1838466, EPI\_ISL\_1838467, EPI\_ISL\_1838468, EPI\_ISL\_1838471, EPI\_ISL\_1838472, EPI\_ISL\_1838473, EPI\_ISL\_1838477, EPI\_ISL\_1838489, EPI\_ISL\_1838494, EPI\_ISL\_1838502, EPI\_ISL\_1838520, EPI\_ISL\_1838522, EPI\_ISL\_1838526, EPI\_ISL\_1838543, EPI\_ISL\_1838545, EPI\_ISL\_1838546, EPI\_ISL\_1838547, EPI\_ISL\_1838548, EPI\_ISL\_1838550, EPI\_ISL\_1838551, EPI\_ISL\_1838552, EPI\_ISL\_1838553, EPI\_ISL\_1838577, EPI\_ISL\_1838578, EPI\_ISL\_1838580, EPI\_ISL\_1838581, EPI\_ISL\_1838583, EPI\_ISL\_1838588, EPI\_ISL\_1838593, EPI\_ISL\_1838594, EPI\_ISL\_1838604, EPI\_ISL\_1838605, EPI\_ISL\_1838610, EPI\_ISL\_1838613, EPI\_ISL\_1838615, EPI\_ISL\_1838616, EPI\_ISL\_1838617, EPI\_ISL\_1838618, EPI\_ISL\_1838619, EPI\_ISL\_1838620, EPI\_ISL\_1838621, EPI\_ISL\_1838622, EPI\_ISL\_1838623, EPI\_ISL\_1838626, EPI\_ISL\_1838629, EPI\_ISL\_1838631, EPI\_ISL\_1838635, EPI\_ISL\_1838636, EPI\_ISL\_1838638, EPI\_ISL\_1838640, EPI\_ISL\_1838650, EPI\_ISL\_1838652, EPI\_ISL\_1838654, EPI\_ISL\_1838655, EPI\_ISL\_1838658, EPI\_ISL\_1838663, EPI\_ISL\_1838664, EPI\_ISL\_1838668, EPI\_ISL\_1838669, EPI\_ISL\_1838670, EPI\_ISL\_1838675, EPI\_ISL\_1838694, EPI\_ISL\_1838696, EPI\_ISL\_1838697, EPI\_ISL\_1838699, EPI\_ISL\_1838708, EPI\_ISL\_1838711, EPI\_ISL\_1838712, EPI\_ISL\_1838716, EPI\_ISL\_1838718, EPI\_ISL\_1838719, EPI\_ISL\_1838722, EPI\_ISL\_1838725, EPI\_ISL\_1838729, EPI\_ISL\_1838730, EPI\_ISL\_1838731, EPI\_ISL\_1838732, EPI\_ISL\_1838733, EPI\_ISL\_1838736, EPI\_ISL\_1838737, EPI\_ISL\_1838738, EPI\_ISL\_1838739, EPI\_ISL\_1838740, EPI\_ISL\_1838741, EPI\_ISL\_1838744, EPI\_ISL\_1838745, EPI\_ISL\_1838746, EPI\_ISL\_1838748, EPI\_ISL\_1838750, EPI\_ISL\_1838755, EPI\_ISL\_1838761, EPI\_ISL\_1838762, EPI\_ISL\_1838763, EPI\_ISL\_1838764, EPI\_ISL\_1838766, EPI\_ISL\_1838768, EPI\_ISL\_1838769, EPI\_ISL\_1838770, EPI\_ISL\_1838771, EPI\_ISL\_1838772, EPI\_ISL\_1838774, EPI\_ISL\_1838775, EPI\_ISL\_1838776, EPI\_ISL\_1838777, EPI\_ISL\_1838778, EPI\_ISL\_1838779, EPI\_ISL\_1838780, EPI\_ISL\_1838785, EPI\_ISL\_1838786, EPI\_ISL\_1838787, EPI\_ISL\_1838788, EPI\_ISL\_1838789, EPI\_ISL\_1838790, EPI\_ISL\_1838795, EPI\_ISL\_1838798, EPI\_ISL\_1838799, EPI\_ISL\_1838802, EPI\_ISL\_1838803, EPI\_ISL\_1838804, EPI\_ISL\_1838806, EPI\_ISL\_1838809, EPI\_ISL\_1838810, EPI\_ISL\_1838811, EPI\_ISL\_1838812, EPI\_ISL\_1838813, EPI\_ISL\_1838814, EPI\_ISL\_1838815, EPI\_ISL\_1838817, EPI\_ISL\_1838818, EPI\_ISL\_1838819, EPI\_ISL\_1838820, EPI\_ISL\_1838821, EPI\_ISL\_1838822, EPI\_ISL\_1838823, EPI\_ISL\_1838824, EPI\_ISL\_1838825, EPI\_ISL\_1838827, EPI\_ISL\_1838828, EPI\_ISL\_1838831, EPI\_ISL\_1838832, EPI\_ISL\_1838833, EPI\_ISL\_1838834, EPI\_ISL\_1838835, EPI\_ISL\_1838836, EPI\_ISL\_1838837, EPI\_ISL\_1838838, EPI\_ISL\_1838839, EPI\_ISL\_1838841, EPI\_ISL\_1838842, EPI\_ISL\_1838843, EPI\_ISL\_1838844, EPI\_ISL\_1838845, EPI\_ISL\_1838846, EPI\_ISL\_1838848, EPI\_ISL\_1838849, EPI\_ISL\_1838851, EPI\_ISL\_1838852, EPI\_ISL\_1838853, EPI\_ISL\_1838854, EPI\_ISL\_1838855, EPI\_ISL\_1838856, EPI\_ISL\_1838857, EPI\_ISL\_1838858, EPI\_ISL\_1838859, EPI\_ISL\_1838860, EPI\_ISL\_1838861, EPI\_ISL\_1838879, EPI\_ISL\_1838882, EPI\_ISL\_1838900, EPI\_ISL\_1838914

see above

CSIR-Centre for Cellular and Molecular Biology

CSIR-Centre for Cellular and Molecular Biology-INSACOG

Payel Mukherjee, Lamuk Zaveri, Tulasi Nagabandi, Ara Sreenivas, Shreekant Verma, Amreshwar Vodapalli, Blessy B John, Viswagithe S L, B Himasri, Valli Nagalakshmi Undamatla, Onkar Kulkarni, Sofia Banu, Archana Bharadwaj Siva, Sharath Chandra Thota, Karthik Bharadwaj Tallapaka, Rakesh K Mishra, Divya Tej Sowpati

EPI\_ISL\_1841236, EPI\_ISL\_1841237, EPI\_ISL\_1841238, EPI\_ISL\_1841239, EPI\_ISL\_1841240, EPI\_ISL\_1841241, EPI\_ISL\_1841242, EPI\_ISL\_1841243, EPI\_ISL\_1841244, EPI\_ISL\_1841245, EPI\_ISL\_1841246, EPI\_ISL\_1841248, EPI\_ISL\_1841249, EPI\_ISL\_1841250, EPI\_ISL\_1841251, EPI\_ISL\_1841252, EPI\_ISL\_1841253, EPI\_ISL\_1841254, EPI\_ISL\_1841255, EPI\_ISL\_1841256, EPI\_ISL\_1841257, EPI\_ISL\_1841258, EPI\_ISL\_1841259, EPI\_ISL\_1841260, EPI\_ISL\_1841261, EPI\_ISL\_1841262, EPI\_ISL\_1841263, EPI\_ISL\_1841265, EPI\_ISL\_1841266, EPI\_ISL\_1841267, EPI\_ISL\_1841268, EPI\_ISL\_1841269, EPI\_ISL\_1841270

see above

ICMR-National Institute of Virology - INSACOG

NIV Influenza

Dr. Varsha Potdar

EPI\_ISL\_953400, EPI\_ISL\_981014,  
EPI\_ISL\_981015, EPI\_ISL\_981027,  
EPI\_ISL\_995306

National Public Health Laboratory, National Centre for  
Infectious Diseases

National Public Health Laboratory, National Centre for  
Infectious Diseases

Tze Minn Mak, Zhenyang Zhou, Lin Cui, Raymond Tzer Pin Lin
